# Supplementary material for: Similar structure but different thermodynamic, dielectric, and frictional properties of confined water in twisted 2D materials: MoS2vs. graphene
Source: Royal Society of Chemistry journal article supplement (doi:10.1039/d4nr03821e), 2024-12-17
Supplement: d4nr03821e1.pdf [file d4nr03821e1.pdf]

# Supplementary Information:-

## Similar Structure but Different Thermodynamic, Dielectric, and Frictional Properties of Confined Water in Twisted 2D Materials: MoS<sub>2</sub> vs. Graphene

Jeet Majumdar,<sup>†</sup> Soham Mandal,<sup>†</sup> Ananth Govind Rajan,<sup>‡</sup> and Prabal K. Maiti\*,<sup>†</sup>

<sup>†</sup>*Centre for Condensed Matter Theory, Department of Physics, Indian Institute of Science,  
Bangalore 560012, India*

<sup>‡</sup>*Department of Chemical Engineering, Indian Institute of Science, Bangalore 560012, India*

E-mail: maiti@iisc.ac.in

### Order Parameter Values

Table 1S: The  $\Psi_4$  and  $\diamond$  order parameter values for MoS<sub>2</sub> systems with respect to twist angle

| Twist [degree] | $\Psi_4$    | pcd( $\diamond$ ) |
|----------------|-------------|-------------------|
| 0.0            | 0.76 ± 0.01 | 0.85 ± 0.01       |
| 9.4            | 0.75 ± 0.01 | 0.86 ± 0.01       |
| 21.8           | 0.72 ± 0.01 | 0.87 ± 0.01       |
| 29.4           | 0.73 ± 0.02 | 0.81 ± 0.03       |

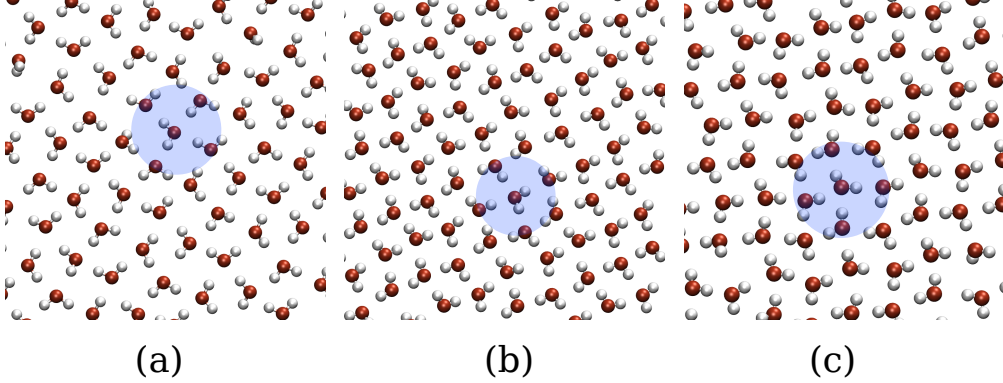

Figure 1S: The confined water structure inside (a)  $0.0^\circ$ , (b)  $9.4^\circ$ , (c)  $21.8^\circ$  twisted bilayer graphene system. These final structures show a regularly ordered water structure, which is described as square like ordering. (d) Shaded region denotes the radius of first nearest neighbors that determine the quartic order parameter.

Table 2S: The  $\Psi_4$  and  $\diamond$  order parameter values for graphene systems with respect to twist angle

| Twist [degree] | $\Psi_4$        | pcd( $\diamond$ ) |
|----------------|-----------------|-------------------|
| 0.0            | $0.73 \pm 0.03$ | $0.85 \pm 0.01$   |
| 9.4            | $0.72 \pm 0.03$ | $0.86 \pm 0.01$   |
| 21.8           | $0.72 \pm 0.03$ | $0.91 \pm 0.01$   |
| 29.4           | $0.74 \pm 0.01$ | $0.89 \pm 0.01$   |

## Synthetic structure formulation

A square is a special rhombus whose diagonal lengths are equal because the rhombus, in that case, will be constrained to have all its angles as  $90^\circ$ . Hence, we start laying out the problem from a general rhombic structure and control the difference of diagonal lengths to get a square. Fig. 3S shows the unit rhombus of side length  $l$  that we consider to find the constrained relation between a diagonal ( $p$ ) and diagonal length difference with the other diagonal ( $d$ ). Thus, the other diagonal is  $p + d$ .

From the geometry of a rhombus and the above definition, we can write,

$$\sqrt{l^2 - \frac{p^2}{4}} - \frac{p}{2} = \frac{d}{2} \quad (1)$$

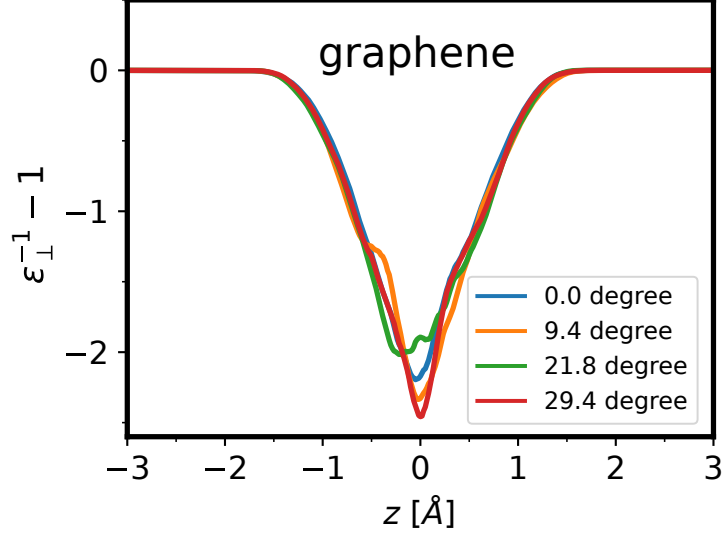

Figure 2S: Confined water dielectric profile inside bilayer graphene for various twist angles.

The solution to the above equation is,

$$\frac{p}{2l} = -\frac{d}{4l} + \frac{1}{4}\sqrt{8 - \frac{d^2}{l^2}} \quad (2)$$

Writing  $d$  as a fraction of  $l$ , *i.e.*  $d = kl$  where  $0 \leq k \leq 1$ ,

$$p = \frac{l}{2}(\sqrt{8 - k^2} - k) \quad (3)$$

We can use this value of  $p$  to construct a synthetic lattice that can be tuned between a square and rhombic ordered structure depending on the value of  $k$  used. Fig. 4S shows the representation of such a construction based on the lattice constant that can be written as,

$$\begin{aligned} \vec{a} &= \left( \frac{(p + kl)}{2}, \frac{p}{2} \right) \\ \vec{b} &= (p + kl, 0) \end{aligned} \quad (4)$$

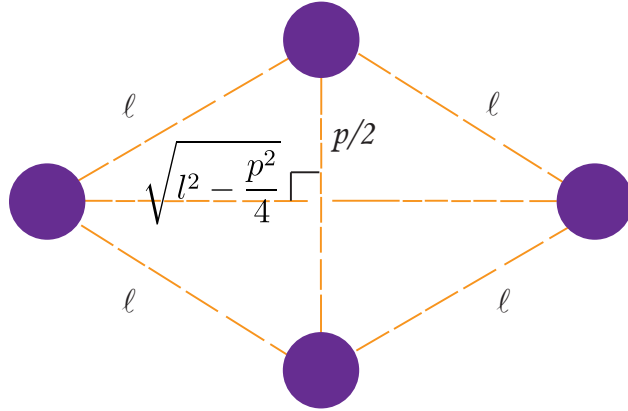

Figure 3S: A unit structure of rhombus. One diagonal of the rhombus is of length  $p$ , and all the sides of the rhombus are of length  $l$ . When  $p = \sqrt{2}l$ , both the diagonals will be of equal length, and it will be a perfect square.

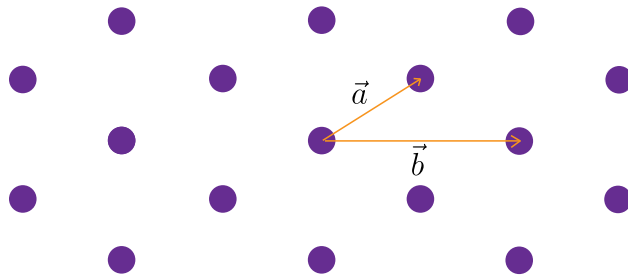

Figure 4S: A rhombic lattice with lattice vectors  $\vec{a}$  and  $\vec{b}$ , constructed from small rhombus units. The structure can be smoothly turned to square and back to any general rhombus by varying  $k$  in the evaluation of  $\vec{a}$  and  $\vec{b}$ .
